# Supplementary material
Source: Springer Nature journal article supplement (https://www.springermedizin.de/resource/supplementary/12974_2009_220_MOESM3_ESM.pdf/9601186)

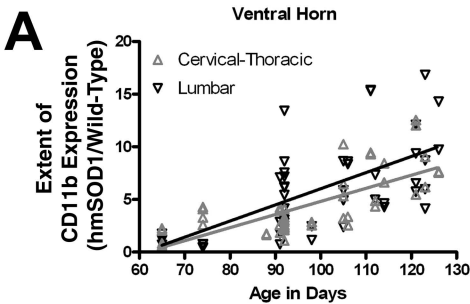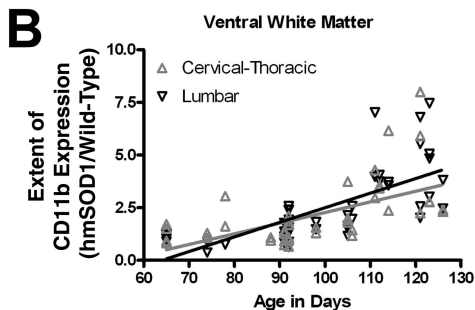

Wildtype
  Pre-Clinical (65-80 days)
  Pre-Clinical (85-95 days)
  Clinical Onset
  Disease End-Stage

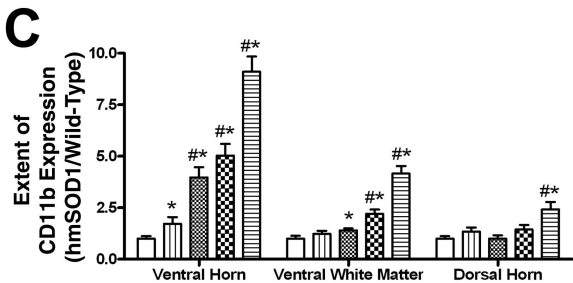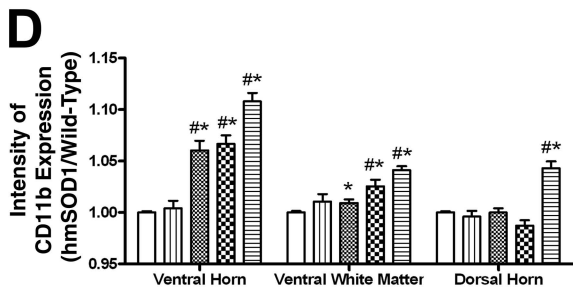

Supplement: MOESM3 [file 9601186]
